# Supplementary material for: Effect of international collaboration on knowledge flow within an innovation system: a Triple Helix approach
Source: Springer Nature journal article supplement (doi:10.1186/s40604-015-0027-0), 2015-11-02
Supplement: MOESM1 [file 11901874]

## Effect of international collaboration on knowledge flow within an innovation system: a Triple Helix approach

اثر التعاون الدولي على تدفق المعرفة في نظام الابتكار : نظرية المراحل الثلاثة  
الكاتب (ة) : Eustache Mègnigbêto

### ملخص

اعتبرت أوراق البحث التي اهتمت بدراسة نظام المراحل الثلاثة في علاقته بالإشراف الدولي المشترك ان التعاون الدولي هو بمثابة الركيزة الرابعة لهذا النظام. تقترح هذه الورقة دراسة تقييم أثر التعاون الدولي على نظام الابتكار على ثلاثة مستويات : داخلية ، خارجية وعالمية. تستخدم هذه الدراسة تبادل المعلومات والقدرة على ارسالها كمؤشرات. تم تنزيل وتحميل البيانات البليوغرافية لكوريا الجنوبية ومنطقة غرب أفريقيا خلال فترة عشر سنوات ( 2001-2010 ) على برمجية تطبيقية بليوغرافية. تم اجراء الابحاث لتحديد الجهات الفاعلة في نظام المراحل الثلاثة ومساهماتها الثنائية أو الثلاثية في اثراء التعاون حسب الجهة ، المستوى والسنة. تم اثار ذلك احتساب مؤشري تبادل المعلومات والقدرة على ارسالها. اظهرت النتائج تكامل نظام الابتكار لكوريا الجنوبية على الصعيد الداخلي مقابل عدم تكامل نظام غرب أفريقيا مقارنة مع شركائها. كما اظهرت النتائج أن التعاون الدولي عزز تبادل المعرفة على الصعيد الداخلي سواء في كوريا الجنوبية او في غرب أفريقيا ، ولكن بأبعاد مختلفة ؛ بعبارة أخرى ، استفادة المنطقتين من التعاون الدولي في مجال تدفق المعرفة.
